# Supplementary material
Source: Springer Nature journal article supplement (https://www.springermedizin.de/resource/supplementary/12885_2010_2253_MOESM7_ESM.pdf/9460862)

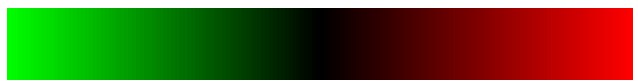

-3.0      0.0      3.0

G5   G6   G9   G2   G7   G8   G4   G11

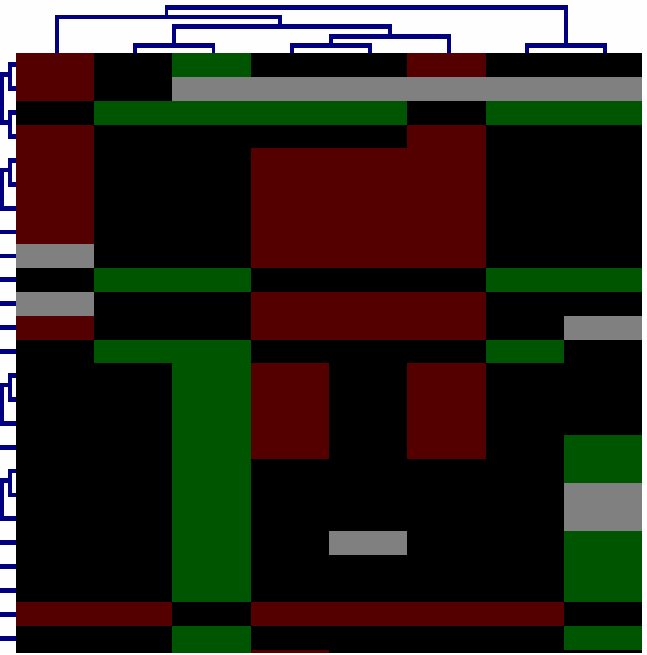

A

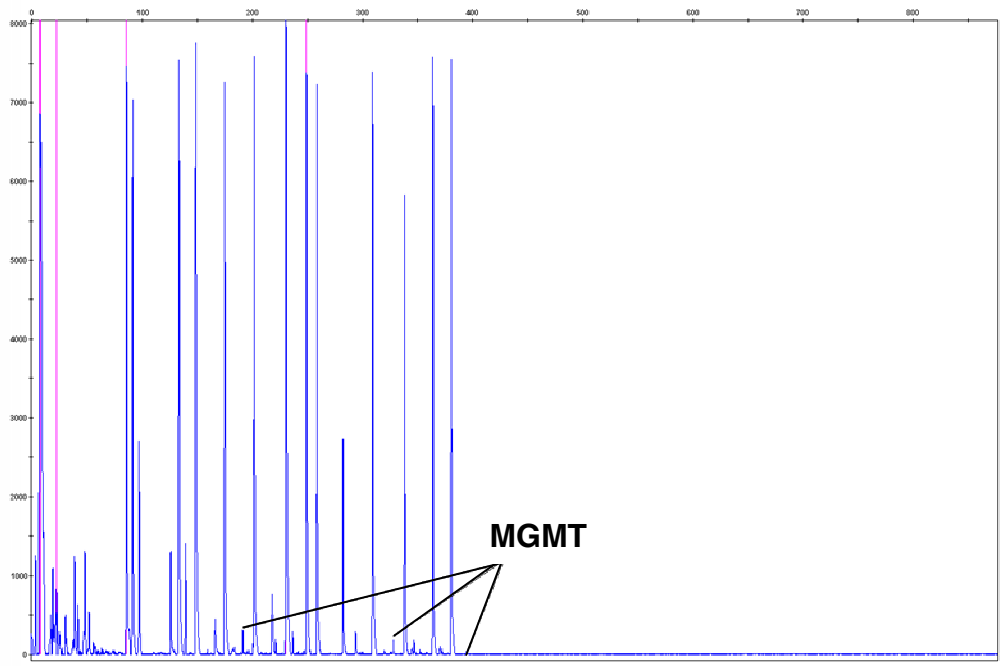

B

Supplement: MOESM7 [file 9460862]
